# Supplementary material
Source: publisher figshare collection journal article supplement (https://acs.figshare.com/ndownloader/files/3736633)
Supplement: Supplementary file 1 [file 3736633]

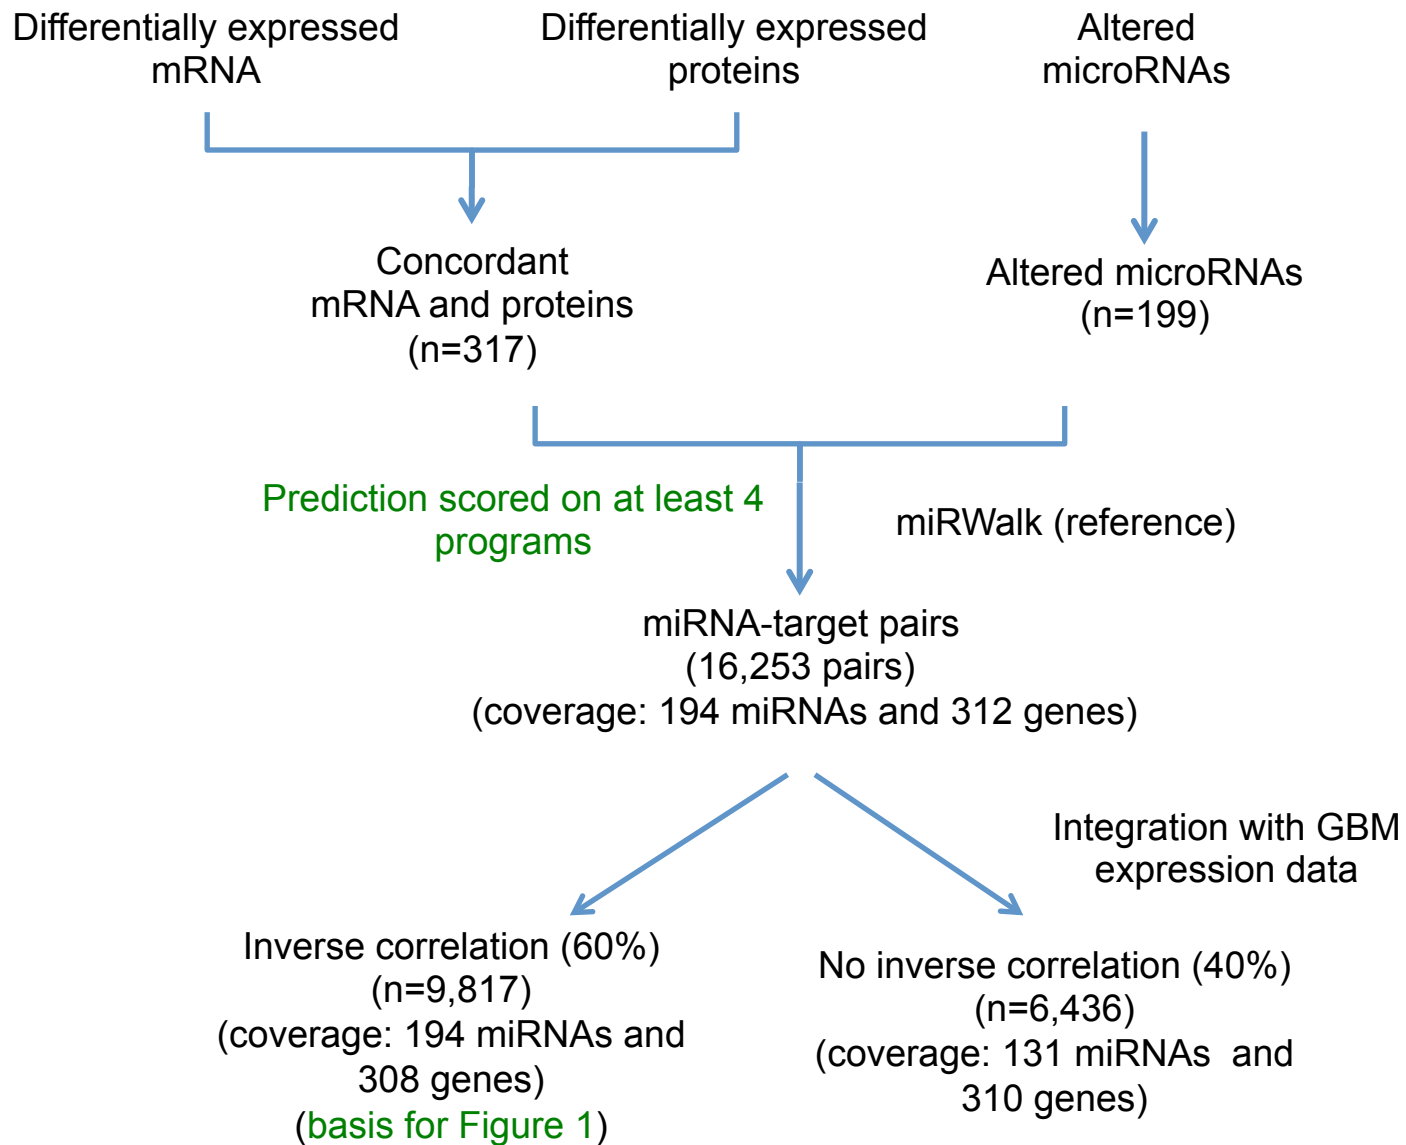

**Supplementary Figure 1: A pipeline for the identification of miRNA and their mRNA and protein targets in GBM data.** The details of the analysis are described under ‘Results and discussion’ and given in **Supplementary Tables 1 and 2.**

**(A)**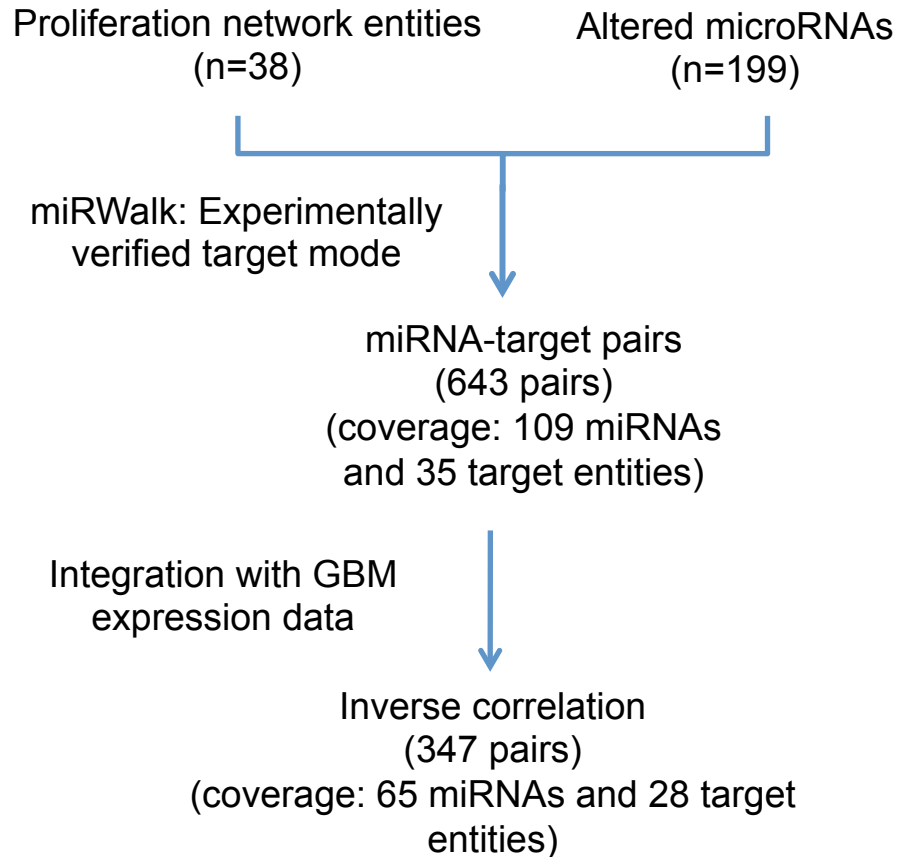**(B)**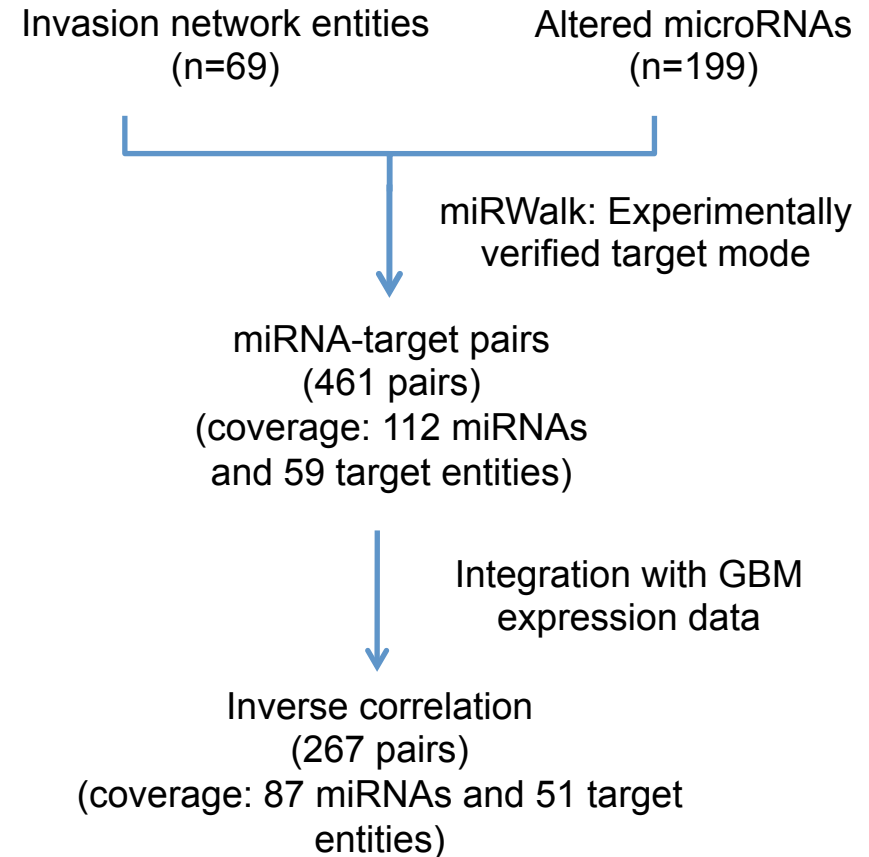

**Supplementary Figure 2: A pipeline for the identification of miRNA and their mRNA and protein targets in cell proliferation (A) and invasion (B) networks.** The details of the analysis are described under 'Results and discussion' and given in **Supplementary Tables 3 and 4.**
